# Supplementary material for: Simvastatin Improves Benign Prostatic Hyperplasia: Role of Peroxisome-Proliferator-Activated Receptor-γ and Classic WNT/β-Catenin Pathway
Source: MDPI journal article supplement (doi:10.3390/ijms24054911), 2023-03-03
Supplement: s1 [file s1]

**Supplementary Table S2** Primer sequence used for qRT-PCR.

| Target genes  |         | Human (5' to 3')        |
|---------------|---------|-------------------------|
| PPAR $\gamma$ | Forward | AGAGATGCCATTCTGGCCCAC   |
|               | Reverse | GTGGAGTAGAAATGCTGGAGA   |
| E-cadherin    | Forward | AATGCCGCCATCGCTTAC      |
|               | Reverse | TCAGGCACCTGACCCTTGTA    |
| N-cadherin    | Forward | TCAGGCGTCTGTAGAGGCTT    |
|               | Reverse | ATGCACATCCTTCGATAAGACTG |
| Vimentin      | Forward | GACGCCATCAACACCGAGTT    |
|               | Reverse | CTTTGTCGTTGGTTAGCTGGT   |
| Snail         | Forward | GACCACTATGCCGCGCTCTT    |
|               | Reverse | TCGCTGTAGTTAGGCTTCCGATT |
| $\alpha$ -SMA | Forward | GGCATTACGAGACCACCTAC    |
|               | Reverse | CGACATGACGTTGTTGGCATAAC |
| collagen I    | Forward | GAGGGCCAAGACGAAGACATC   |
|               | Reverse | CAGATCACGTCATCGCACAAAC  |
| GAPDH         | Forward | ATCCCATCACCATCTTCCAGGAG |
|               | Reverse | CCTGCTTCACCACCTTCTTGATG |
