# Supplementary material for: Simvastatin Improves Benign Prostatic Hyperplasia: Role of Peroxisome-Proliferator-Activated Receptor-γ and Classic WNT/β-Catenin Pathway
Source: MDPI journal article supplement (doi:10.3390/ijms24054911), 2023-03-03
Supplement: s1 [file s1]

**Supplementary Table S1** Variation of biometric and physiological parameters in Control, T, T+SV and T+SV +GW rats.

| Group   | Body weight (g) |                | Ventral prostate<br>Weight (mg) | Seminal vesicles<br>Weight (mg) | Prostate<br>index |
|---------|-----------------|----------------|---------------------------------|---------------------------------|-------------------|
|         | Initial         | Final          |                                 |                                 |                   |
| Control | 219.8(6.3)      | 505.1(37.5)    | 683.6(108.2)                    | 1407.4(152.2)                   | 1.2(0.1)          |
| T       | 223.9(10.0)     | 410.9(21.6) ** | 1234.1(129.7) **                | 2889.6(435.6) **                | 3.0(0.2) **       |
| T+SV    | 219.1(9.3)      | 366.4(14.1) ** | 950.3(113.3) **                 | 2522.7(387.4)                   | 2.2(0.2) **       |
| T+SV+GW | 213.6(5.7)      | 396.7(10.7) *  | 1159.6(124.6) *                 | 3202.7(510.3) *                 | 3.1(0.2) *        |

T testosterone, SV simvastatin, GW GW9662. \*\*  $p < 0.01$  T vs Control, \*\*  $p < 0.01$  T vs T+SV, \*  $p < 0.05$  T+SV vs T+SV +GW.
