# Supplementary material for: Simvastatin Improves Benign Prostatic Hyperplasia: Role of Peroxisome-Proliferator-Activated Receptor-γ and Classic WNT/β-Catenin Pathway
Source: MDPI journal article supplement (doi:10.3390/ijms24054911), 2023-03-03
Supplement: s1 [file s1]

**Supplementary Table S3** List of primary antibodies.

| Antigens         | Supplier           | Species antibodies raised in | Dilution used |
|------------------|--------------------|------------------------------|---------------|
| PPAR $\gamma$    | ABclonal           | Rabbit                       | 1:1000 (WB)   |
|                  | A0270              | Polyclonal antibody          | 1:100 (IF)    |
| BAX              | ABclonal           | Rabbit                       | 1:1000 (WB)   |
|                  | A12009             | Polyclonal antibody          |               |
| Bcl-2            | ABclonal           | Rabbit                       | 1:1000 (WB)   |
|                  | A11025             | Polyclonal antibody          |               |
| Cyto c           | Proteintech        | Rabbit                       | 1:1000 (WB)   |
|                  | 10993-1-AP         | Polyclonal antibody          |               |
| CDK2             | Cell Signaling     | Rabbit                       | 1:1000 (WB)   |
|                  | Technology, #2546  | Monoclonal antibody          |               |
| CDK4             | Cell Signaling     | Rabbit                       | 1:1000 (WB)   |
|                  | Technology, #12790 | Monoclonal antibody          |               |
| Cyclin D1        | Cell Signaling     | Rabbit                       | 1:1000 (WB)   |
|                  | Technology, #2978  | Monoclonal antibody          |               |
| E-cadherin       | ABclonal           | Rabbit                       | 1:1000 (WB)   |
|                  | A16811             | Polyclonal antibody          |               |
| N-cadherin       | ABclonal           | Rabbit                       | 1:1000 (WB)   |
|                  | A0433              | Monoclonal antibody          |               |
| Vimentin         | ABclonal           | Rabbit                       | 1:1000 (WB)   |
|                  | A19607             | Monoclonal antibody          |               |
| Snail            | ABclonal           | Rabbit                       | 1:1000 (WB)   |
|                  | A5243              | Polyclonal antibody          |               |
| $\alpha$ -SMA    | Servicebio         | Mouse                        | 1:1000 (WB)   |
|                  | GB13044            | Monoclonal antibody          | 1:500 (IF)    |
| collagen I       | ABclonal           | Rabbit                       | 1:1000 (WB)   |
|                  | A1352              | Polyclonal antibody          | 1:200 (IF)    |
| WNT-1            | Proteintech        | Rabbit                       | 1:1000 (WB)   |
|                  | 27935-1-AP         | Polyclonal antibody          |               |
| $\beta$ -catenin | Proteintech        | Rabbit                       | 1:1000 (WB)   |
|                  | 51067-2-AP         | Polyclonal antibody          |               |
| GAPDH            | ABclonal           | Rabbit                       | 1:10000 (WB)  |
|                  | AC027              | Polyclonal antibody          |               |
