# Supplementary material for: Simvastatin Improves Benign Prostatic Hyperplasia: Role of Peroxisome-Proliferator-Activated Receptor-γ and Classic WNT/β-Catenin Pathway
Source: MDPI journal article supplement (doi:10.3390/ijms24054911), 2023-03-03
Supplement: s1 [file s1]

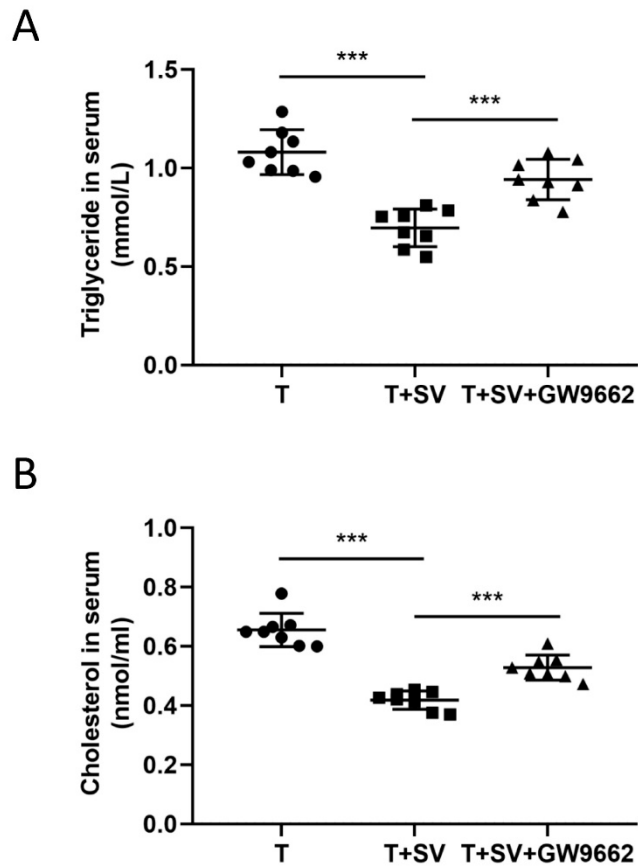

#### Supplementary Figure legends

##### Supplementary Fig. S1 Simvastatin reduces lipid concentrations through PPAR $\gamma$ *in vivo*.

(A) Serum triglyceride concentrations were measured by Elisa in BPH, simvastatin-treated, and simvastatin + GW9662-treated rats. (B) Serum cholesterol concentrations were measured by Elisa in BPH, simvastatin-treated, and simvastatin + GW9662-treated rats. T Testosterone propionate, SV simvastatin, \*\*\*  $p < 0.001$ ; one-way ANOVA.
