# Supplementary material for: Simvastatin Improves Benign Prostatic Hyperplasia: Role of Peroxisome-Proliferator-Activated Receptor-γ and Classic WNT/β-Catenin Pathway
Source: MDPI journal article supplement (doi:10.3390/ijms24054911), 2023-03-03
Supplement: s1 [file s1]

**Supplementary Table S4** List of secondary antibodies.

| <b>Secondary Detection System Used</b>                                           | <b>Host</b> | <b>Dilution used</b> | <b>Supplier</b>                                                 |
|----------------------------------------------------------------------------------|-------------|----------------------|-----------------------------------------------------------------|
| Anti-Mouse-IgG (H + L)-HRP                                                       | Goat        | 1:10,000 (WB)        | Sungene Biotech, Tianjin, China, Cat. #LK2003                   |
| Anti-Rabbit-IgG (H + L)-HRP                                                      | Goat        | 1:10,000 (WB)        | Sungene Biotech, Cat. #LK2001                                   |
| Anti-Mouse IgG (H+L), F(ab') <sub>2</sub> Fragment (Alexa Fluor® 488 Conjugate)  | Goat        | 1:50 (IF)            | Cell Signaling Technology, USA, cat. no. 4408                   |
| Anti-Rabbit IgG (H+L), F(ab') <sub>2</sub> Fragment (Alexa Fluor® 488 Conjugate) | Goat        | 1:50 (IF)            | Cell Signaling Technology, USA, cat. no. 4412                   |
| Hoechst 33342 (1 mg/ml) nucleic acid staining (DAPI)                             | -           | 1:750 (IF)           | Molecular Probes/Invitrogen, Carlsbad, CA, USA, cat. no. A11007 |
